# Supplementary material for: Plasma Metabolic Profiling Analysis of Gout Party on Acute Gout Arthritis Rats Based on UHPLC–Q–TOF/MS Combined with Multivariate Statistical Analysis
Source: PubMed Central journal article supplement (PMC6888674; doi:10.3390/ijms20225753), 2019-11-15
Supplement: ijms-20-05753-s001.pdf [file ijms-20-05753-s001.pdf]

**Table S1.** The ROC AUC.

|                                         | AUC   |
|-----------------------------------------|-------|
| LPE(0:0/16:0)                           | 0.889 |
| Deoxycholic acid glycine conjugate      | 0.889 |
| Equol 4'-O-glucuronide                  | 1.000 |
| Glycocholic acid                        | 0.917 |
| m-Methylhippuric acid                   | 0.917 |
| p-Cresol sulfate                        | 0.736 |
| 10-Hydroxy-9-(phosphonoxy)octadecanoate | 0.972 |
| Argininic acid                          | 0.889 |
| Sphinganine 1-phosphate                 | 1.000 |
| Estriol 3-sulfate 16-glucuronide        | 0.917 |
| 3-Hydroxyoctanoic acid                  | 0.861 |
| 3-Dehydrocarnitine                      | 0.889 |
| Docosahexaenoic acid                    | 1.000 |
| 3-Hexenedioic acid                      | 0.944 |
| LPE(0:0/20:3)                           | 0.944 |
| Erythrose                               | 0.778 |
| LPC(15:0)                               | 0.972 |
| 2-Ketobutyric acid                      | 1.000 |
| Glycocholic acid                        | 0.889 |
| Alanine                                 | 0.917 |
| Lactic acid                             | 0.917 |
| LPE(0:0/16:0)                           | 0.889 |

**Chromatographic and mass spectrometric conditions**

HPLC analysis was performed using a Waters UHPLC-Q-TOF/MS system (Waters, USA). Plasma samples (5 mL) were injected into an ACQUITY UPLC BEH C18 column (2.1×100 mm×1.7 μm, Waters), The column temperature was 40°C, and the flow rate was 0.3 mL min<sup>-1</sup>. Q-TOF/MS was equipped with electrospray ionisation in negative mode. The MS parameters were as follows: drying gas temperature, 450°C; drying gas flow, 10mL /min; desolvation gas flow, 800 L/h; capillary voltage, 2.5kV; Ionization source temperature, 100°C; reference ions [M-H]<sup>-</sup>=554.2615; data acquisition range, m/z 50-1000Da.

**Table S2.** The correlation matrix of 22 Biomarkers

|                    | Lactic acid | 2-Ketobutyric acid | 3-Hexenedioic acid | Galactonic acid | Sphinganine 1-phosphate | LysoPE(0:0/16:0) | Glycocolic acid | LysoPE(0:0/20:3) | Argininc acid | But-2-enoiac acid | Deoxyglycine conjugate | LysolPC (15:0) | Equol 4-O-glucuronide | 3-Dehydrocarnitine | Docosahexaenoic acid | 10-hydroxy-9-(phosphonoxy)octadecanoate | Alanine  | Erythrose | 3-Hydroxyoctanoic acid | Estradiol 3-sulfate 16-glucuronide | p-Cresol sulfate | m-Methylpuric acid |
|--------------------|-------------|--------------------|--------------------|-----------------|-------------------------|------------------|-----------------|------------------|---------------|-------------------|------------------------|----------------|-----------------------|--------------------|----------------------|-----------------------------------------|----------|-----------|------------------------|------------------------------------|------------------|--------------------|
| Lactic acid        | 1           | 0.76006            | 0.60195            | 0.72027         | 0.42614                 | 0.24551          | 0.435           | 0.62007          | 0.52683       | 0.04730           | 0.1727                 | 0.2287         | 0.31871               | -0.31238           | -0.61055             | -0.73166                                | -0.49468 | -0.67904  | -0.10204               | -0.45991                           | -0.043661        | -0.33435           |
| 2-Ketobutyric acid | 0.76006     | 1                  | 0.81768            | 0.89191         | 0.62667                 | 0.61978          | 0.66733         | 0.58354          | 0.58128       | 0.07124           | 0.42247                | 0.53664        | 0.5976                | -0.36412           | -0.65499             | -0.69317                                | -0.62601 | -0.60503  | -0.48571               | -0.52439                           | -0.062021        | -0.55234           |
| 3-Hexenedioic acid | 0.60195     | 0.81768            | 1                  | 0.81701         | 0.49742                 | 0.56108          | 0.43689         | 0.44062          | 0.57246       | 0.03551           | 0.24776                | 0.43123        | 0.3943                | -0.42436           | -0.79982             | -0.82513                                | -0.53913 | -0.50894  | -0.44627               | -0.34001                           | -0.055416        | -0.55277           |
| Galactonic acid    | 0.72027     | 0.89191            | 0.81701            | 1               | 0.42265                 | 0.4062           | 0.38696         | 0.39454          | 0.60067       | 0.05803           | 0.26351                | 0.33095        | 0.42436               | -0.33572           | -0.67072             | -0.78913                                | -0.60149 | -0.48179  | -0.33997               | -0.49435                           | -0.052588        | -0.46075           |
| Sphinganine        | 0.42614     | 0.62667            | 0.49742            | 0.42265         | 1                       | 0.679            | 0.62            | 0.6310           | 0.3           | 0.0               | 0.56                   | 0.69           | 0.61                  | -                  | -                    | -0.48426                                | -        | -         | -                      | -                                  | -                | -                  |

|                                    |                     |             |             |                 |             |             |             |             |                 |                     |             |             |             |                  |                  |          |                          |                       |                  |                  |                          |                  |
|------------------------------------|---------------------|-------------|-------------|-----------------|-------------|-------------|-------------|-------------|-----------------|---------------------|-------------|-------------|-------------|------------------|------------------|----------|--------------------------|-----------------------|------------------|------------------|--------------------------|------------------|
| ne 1-phosphate                     | 42<br>61<br>4       | 667         | 742         | 226<br>5        |             | 84          | 778         | 5           | 12<br>37        | 71<br>99<br>6       | 69          | 15          | 316         | 0.369<br>94      | 0.685<br>42      |          | 0.<br>49<br>03<br>8      | 0.59<br>467           | 0.500<br>49      | 0.63<br>236      | 0.<br>45<br>10<br>3      | 0.571<br>4       |
| LysoPE(0:0/16:0)                   | 0.<br>24<br>55<br>1 | 0.61<br>978 | 0.56<br>108 | 0.4<br>062      | 0.67<br>984 | 1           | 0.70<br>81  | 0.6350<br>1 | 0.4<br>41<br>4  | 0.<br>62<br>05<br>8 | 0.65<br>911 | 0.83<br>91  | 0.70<br>579 | -<br>0.283<br>95 | -<br>0.439<br>03 | -0.2654  | -<br>0.<br>18<br>08<br>7 | -<br>0.14<br>222      | -<br>0.625<br>73 | -<br>0.58<br>924 | -<br>0.<br>78<br>21<br>5 | -<br>0.761<br>61 |
| Glycocholic acid                   | 0.<br>43<br>5       | 0.66<br>733 | 0.43<br>689 | 0.3<br>869<br>6 | 0.62<br>778 | 0.708<br>1  | 1           | 0.7486<br>4 | 0.6<br>05<br>36 | 0.<br>71<br>99      | 0.81<br>189 | 0.76<br>019 | 0.84<br>166 | -<br>0.566<br>09 | -<br>0.352<br>22 | -0.24902 | -<br>0.<br>44<br>35<br>2 | -<br>0.31<br>261      | -<br>0.602<br>94 | -<br>0.64<br>718 | -<br>0.<br>64<br>32<br>4 | -<br>0.506<br>12 |
| LysoPE(0:0/20:3)                   | 0.<br>62<br>00<br>7 | 0.58<br>354 | 0.44<br>062 | 0.3<br>945<br>4 | 0.63<br>105 | 0.635<br>01 | 0.74<br>864 | 1           | 0.6<br>47<br>89 | 0.<br>60<br>68<br>4 | 0.57<br>166 | 0.59<br>167 | 0.64<br>399 | -<br>0.508<br>93 | -<br>0.521<br>91 | -0.4969  | -<br>0.<br>31<br>10<br>5 | -<br>0.32<br>43       | -<br>0.516<br>86 | -<br>0.56<br>775 | -<br>0.<br>55<br>26<br>2 | -<br>0.501<br>54 |
| Argininic acid                     | 0.<br>52<br>68<br>3 | 0.58<br>128 | 0.57<br>246 | 0.6<br>006<br>7 | 0.31<br>237 | 0.441<br>4  | 0.60<br>536 | 0.6478<br>9 | 1               | 0.<br>54<br>25<br>5 | 0.63<br>389 | 0.63<br>256 | 0.77<br>07  | -<br>0.471<br>01 | -<br>0.472<br>11 | -0.6604  | -<br>0.<br>22<br>32<br>8 | -<br>0.05<br>739<br>2 | -<br>0.562<br>18 | -<br>0.56<br>929 | -<br>0.<br>39<br>59<br>8 | -<br>0.240<br>36 |
| But-2-enoic acid                   | 0.<br>47<br>30<br>3 | 0.71<br>246 | 0.35<br>551 | 0.5<br>803<br>6 | 0.71<br>996 | 0.620<br>58 | 0.71<br>99  | 0.6068<br>4 | 0.5<br>42<br>55 | 1                   | 0.78<br>914 | 0.71<br>211 | 0.85<br>061 | -<br>0.220<br>21 | -<br>0.462<br>87 | -0.38922 | -<br>0.<br>32<br>49<br>1 | -<br>0.24<br>632      | -<br>0.647<br>97 | -<br>0.65<br>706 | -<br>0.<br>42<br>82<br>4 | -<br>0.311<br>57 |
| Deoxycholic acid glycine conjugate | 0.<br>17<br>27      | 0.42<br>247 | 0.24<br>776 | 0.2<br>635<br>1 | 0.56<br>69  | 0.659<br>11 | 0.81<br>189 | 0.5716<br>6 | 0.6<br>33<br>89 | 0.<br>78<br>91<br>4 | 1           | 0.88<br>072 | 0.94<br>122 | -<br>0.471<br>42 | -<br>0.357<br>8  | -0.19718 | -<br>0.<br>20<br>82      | 0.00<br>642<br>01     | -<br>0.763<br>87 | -<br>0.63<br>446 | -<br>0.<br>41<br>35      | -<br>0.255<br>72 |

|                                         |          |          |          |          |          |          |          |          |          |          |          |          |          |          |          |          |          |          |          |          |          |          |  |
|-----------------------------------------|----------|----------|----------|----------|----------|----------|----------|----------|----------|----------|----------|----------|----------|----------|----------|----------|----------|----------|----------|----------|----------|----------|--|
|                                         |          |          |          |          |          |          |          |          |          |          |          |          |          |          |          |          | 1        |          |          |          |          | 1        |  |
| LysoPC(15:0)                            | 0.2287   | 0.53664  | 0.43123  | 0.33095  | 0.6915   | 0.8391   | 0.76019  | 0.59167  | 0.63256  | 0.07121  | 0.88072  | 1        | 0.90448  | -0.42246 | -0.46184 | -0.32103 | -0.22163 | -0.14652 | -0.75488 | -0.64629 | -0.51726 | -0.46464 |  |
| Equol 4'-O-glucuronide                  | 0.31871  | 0.5976   | 0.3943   | 0.42436  | 0.61316  | 0.70579  | 0.84166  | 0.64399  | 0.7707   | 0.08506  | 0.94122  | 0.90448  | 1        | -0.37502 | -0.39163 | -0.3524  | -0.20182 | -0.05446 | -0.77329 | -0.66208 | -0.45246 | -0.30373 |  |
| 3-Dehydrocarnitine                      | -0.31238 | -0.36412 | -0.42436 | -0.33572 | -0.36994 | -0.28395 | -0.56609 | -0.50893 | -0.47101 | -0.02202 | -0.47142 | -0.42246 | -0.37502 | 1        | 0.5457   | 0.41411  | 0.77368  | 0.4698   | 0.42224  | 0.40362  | 0.3439   | 0.35512  |  |
| Docosaheaxaenoic acid                   | -0.61055 | -0.65499 | -0.79982 | -0.67072 | -0.68542 | -0.43903 | -0.35222 | -0.52191 | -0.47211 | -0.04628 | -0.3578  | -0.46184 | -0.39163 | 0.5457   | 1        | 0.88471  | 0.61073  | 0.63126  | 0.54096  | 0.3365   | 0.2884   | 0.34854  |  |
| 10-hydroxy-9-(phosphonoxy)octadecanoate | -0.73166 | -0.69317 | -0.82513 | -0.78913 | -0.48426 | -0.2654  | -0.24902 | -0.4969  | -0.6604  | -0.03892 | -0.19718 | -0.32103 | -0.3524  | 0.41411  | 0.88471  | 1        | 0.50878  | 0.54689  | 0.40371  | 0.30975  | 0.34547  | 0.23862  |  |
| Alanine                                 | -0.49468 | -0.62601 | -0.53913 | -0.60149 | -0.49038 | -0.18087 | -0.44352 | -0.31105 | -0.22328 | -0.03249 | -0.20821 | -0.22163 | -0.20182 | 0.77368  | 0.61073  | 0.50878  | 1        | 0.81552  | 0.25199  | 0.3397   | 0.30608  | 0.38127  |  |

|                                  |                          |                  |                  |                      |                  |                  |                  |                  |                           |                          |                   |                  |                       |             |             |         |                     |                  |              |             |                     |              |
|----------------------------------|--------------------------|------------------|------------------|----------------------|------------------|------------------|------------------|------------------|---------------------------|--------------------------|-------------------|------------------|-----------------------|-------------|-------------|---------|---------------------|------------------|--------------|-------------|---------------------|--------------|
| Erythrulose                      | -<br>0.<br>67<br>90<br>4 | -<br>0.60<br>503 | -<br>0.50<br>894 | -<br>0.4<br>817<br>9 | -<br>0.59<br>467 | -<br>0.142<br>22 | -<br>0.31<br>261 | -<br>0.3243      | -<br>0.0<br>57<br>39<br>2 | -<br>0.<br>24<br>63<br>2 | 0.00<br>642<br>01 | -<br>0.14<br>652 | -<br>0.05<br>446<br>2 | 0.469<br>8  | 0.631<br>26 | 0.54689 | 0.<br>81<br>55<br>2 | 1                | 0.029<br>764 | 0.26<br>736 | 0.<br>23<br>42<br>5 | 0.359<br>27  |
| 3-Hydroxyoctanoic                | -<br>0.<br>10<br>20<br>4 | -<br>0.48<br>571 | -<br>0.44<br>627 | -<br>0.3<br>399<br>7 | -<br>0.50<br>049 | -<br>0.625<br>73 | -<br>0.60<br>294 | -<br>0.5168<br>6 | -<br>0.5<br>62<br>18      | -<br>0.<br>64<br>79<br>7 | -<br>0.76<br>387  | -<br>0.75<br>488 | -<br>0.77<br>329      | 0.422<br>24 | 0.540<br>96 | 0.40371 | 0.<br>25<br>19<br>9 | 0.02<br>976<br>4 | 1            | 0.17<br>482 | 0.<br>15<br>50<br>9 | 0.089<br>025 |
| Estriol 3-sulfate 16-glucuronide | -<br>0.<br>45<br>99<br>1 | -<br>0.52<br>439 | -<br>0.34<br>001 | -<br>0.4<br>943<br>5 | -<br>0.63<br>236 | -<br>0.589<br>24 | -<br>0.64<br>718 | -<br>0.5677<br>5 | -<br>0.5<br>69<br>29      | -<br>0.<br>65<br>70<br>6 | -<br>0.63<br>446  | -<br>0.64<br>629 | -<br>0.66<br>208      | 0.403<br>62 | 0.336<br>5  | 0.30975 | 0.<br>33<br>97      | 0.26<br>736      | 0.174<br>82  | 1           | 0.<br>74<br>18<br>1 | 0.693<br>73  |
| p-Cresol sulfate                 | -<br>0.<br>43<br>66<br>1 | -<br>0.62<br>021 | -<br>0.55<br>416 | -<br>0.5<br>258<br>8 | -<br>0.45<br>103 | -<br>0.782<br>15 | -<br>0.64<br>324 | -<br>0.5526<br>2 | -<br>0.3<br>95<br>98      | -<br>0.<br>42<br>82<br>4 | -<br>0.41<br>351  | -<br>0.51<br>726 | -<br>0.45<br>246      | 0.343<br>9  | 0.288<br>4  | 0.21547 | 0.<br>30<br>60<br>8 | 0.23<br>425      | 0.155<br>09  | 0.74<br>181 | 1                   | 0.922<br>43  |
| m-Methylhippuric acid            | -<br>0.<br>33<br>43<br>5 | -<br>0.55<br>234 | -<br>0.55<br>277 | -<br>0.4<br>607<br>5 | -<br>0.57<br>14  | -<br>0.761<br>61 | -<br>0.50<br>612 | -<br>0.5015<br>4 | -<br>0.2<br>40<br>36      | -<br>0.<br>31<br>15<br>7 | -<br>0.25<br>572  | -<br>0.46<br>464 | -<br>0.30<br>373      | 0.355<br>12 | 0.348<br>54 | 0.23862 | 0.<br>38<br>12<br>7 | 0.35<br>927      | 0.089<br>025 | 0.69<br>373 | 0.<br>92<br>24<br>3 | 1            |

**Table S3.** UHPLC–Q–TOF/MS gradient elution method

| T(min) | Phase A (0.1% formic acid)<br>in water | Phase B (0.1% formic acid)<br>in acetonitrile |
|--------|----------------------------------------|-----------------------------------------------|
| 0      | 98                                     | 2                                             |
| 5      | 94                                     | 6                                             |
| 10     | 87                                     | 13                                            |
| 15     | 85                                     | 15                                            |
| 20     | 80                                     | 20                                            |
| 25     | 72                                     | 28                                            |
| 30     | 60                                     | 40                                            |
| 35     | 15                                     | 85                                            |
| 40     | 15                                     | 85                                            |
| 42     | 98                                     | 2                                             |
| 45     | 98                                     | 2                                             |

**spectrometric conditions:**

The MS parameters were as follows: drying gas temperature, 450°C; drying gas flow, 10mL /min; desolvation gas flow, 800 L/h; capillary voltage, 2.5kV; Ionization source temperature, 100°C.
